# Supplementary material
Source: publisher figshare collection journal article supplement (https://tandf.figshare.com/ndownloader/files/14964551)
Supplement: Supplementary file 1 [file 14964551]

ORIGINAL ARTICLE

# Comparison of 3D conformal radiation therapy and intensity-modulated radiation therapy in patients with endometrial cancer: efficacy, safety and prognostic analysis

Minh-Hanh Taa, Antoine Schernberg, MDa, Paul Girauda, Laurie Monnier, MDa, Émile Darai, MD, PhDb, Sofiane Bendifallah, MD, PhDb, Michel Schlienger, MD, PhDa, Emmanuel Touboul, MD, PhDa, Alexandre Orthuon, PhDa, Thierry Challand, MDa,Florence Huguet, MD, PhDa, Eleonor Rivin del Campo, MD, PhDa

SUPPLEMENTARY MATERIAL

**Supplementary Material. Table 1. Dose contraints for the organs at risk (OARs).**

**Supplementary Material. Table 2. Predictive factors of overall survival.**

**Supplementary Material. Table 1. Dose contraints for the organs at risk (OARs).**

|  | | **3DCRT** | **IMRT** |
| --- | --- | --- | --- |
| **Bladder** | **D2%** | 45Gy | 45Gy |
| **V40** | 40% | 40% |
| **Rectum** | **D2%** | 45Gy | 45Gy |
| **Bowel bag** | **V40** | reporting | 10-15% |
| **Anal Canal** | **D2%** | 45Gy | 45Gy |
| **Iliac bone** | **V30** | - | 35% |
| **Femoral Head** | **V30** | 5-10% | 5-10% |

**Abbreviations**: Dx%: dose received by x% of the OAR volume; Vx : percentage of the OAR volume receiving x Gy.

**Supplementary Material. Table 2. Predictive factors of overall survival.**

| **Factor** | **n = 83** | **Deaths**  **n = 20 (%)** | **5-year OS (%) (95%CI)** | ***p* univariate analysis** | ***p* multivariate analysis** | **HR (95%CI) multivariate analysis** |
| --- | --- | --- | --- | --- | --- | --- |
| **Age (years)**  ≤ 68  > 68 | 42  41 | 3 (7.1)  17 (41.5) | 95% (0.88-1)  55% (0.40-0.75) | **0.00065** | **0.0011** | 9.7 (2.5-38.2) |
| **T stage**  T1  > T1 | 51  32 | 9 (17.6)  11 (34.4) | 81.6% (0.71-0.94)  66.8% (0.52-0.86) | 0.1 | **0.025** | 3 (1.15-8) |
| **N stage**  N0  N1 | 31  32 | 7 (22.6)  5 (15.6) | 79% (0.65-0.95)  84% (0.7-0.98) | 0.43 | -- | -- |
| **FIGO stage**  I-II  III | 38  45 | 7 (18.4)  13 (28.9) | 80% (0.67-0.96)  72% (0.6-0.87) | 0.35 | -- | -- |
| **Histology type**  Type I  Type II | 61  22 | 12 (19.7)  8 (36.4 | 82% (0.73-0.93)  56% (0.37-0.86) | 0.087 | 0.27 | -- |
| **Grade**  1-2  3 | 49  25 | 7(14.3)  12 (48.0) | 87.3% (0.78-0.97)  49% (0.32-0.76) | **0.0022** | **0.048** | 1.7 (1.0-2.9) |
| **LVSI**  Yes  No | 35  36 | 9(25.7)  9(25.0) | 76.7% (0.63-0.94)  72% (0.59-0.89) | 0.82 | **--** | -- |
| **Lymphadenectomy**  Yes  No | 64  19 | 12 (18.7)  8 (42.1) | 52% (0.3-0.88)  82% (0.72-0.92) | **0.0095** | 0.94 | -- |
| **EBRT technique**  3D  IMRT | 47  36 | 13 (27.6)  7 (19.4) | 75% (0.63-0.88)  78% (0.65-0.94) | 0.74 | **--** | -- |

**Abbreviations:** n, number of patients; HR: Hazard ratio; 95%CI: 95% confidence interval; OS: overall survival; LVSI: lymphovascular space invasion; EBRT: external beam radiotherapy technique; 3DCRT: 3D conformal radiation therapy; IMRT: Intensity-Modulated Radiation Therapy.
